# Supplementary material
Source: PubMed Central journal article supplement (PMC10642159)
Supplement: NIHMS1941580-supplement-Brock_et_al_2022_Supplementary_Material.pdf [file NIHMS1941580-supplement-Brock_et_al_2022_Supplementary_Material.pdf]

## Supplementary data

1. Literature review of clinical features of *GRIN1* and *GRIN2B*- associated MCD
  - a. Supplementary table 1: Clinical and imaging features of patients with variants in *GRIN1*
  - b. Supplementary table 2: Clinical and imaging features of patients with variants in *GRIN2B*
  - c. Supplementary table 3: Abnormal brain MRI findings in NMDAR MCD patients.
2. Molecular data
  - a. Supplementary table 4: ACMG-AMP criteria used to classify the NMDAR variants
  - b. Supplementary table 5: *In silico* predictions for the NMDAR missense variants
3. Electrophysiological studies
  - a. Methods
  - b. Results
4. Neuropathology
  - a. Methods
  - b. Supplementary table 6: Antibodies used for the study
  - c. Supplementary table 7: Comparative semi-quantitative analysis of immunolabelling in the germinative and intermediate zones as well as in the different layers of the frontal cortex of affected and control patients
  - d. d. Supplementary figure 1: Main brain macroscopic and histological findings of individual 8

# 1. Literature review of clinical features of *GRIN1* and *GRIN2B*- associated MCD

## a. Supplementary table 1 – Clinical and imaging features of patients with variants in *GRIN1*

|                                       | Fry et al. - P1                      | Fry et al. - P2                      | Fry et al. - P3                      | Fry et al. - P4               | Fry et al. - P5                      | Fry et al. - P6                      | Fry et al. - P7          | Fry et al. - P8                      | Fry et al. - P9          | Fry et al. - P10                     | Fry et al. - P11                     | Nishimura et al., 2020   | P1 (This paper)          | P2 (This paper)                   | P3 (This paper)             | P4 (This paper)                                            |
|---------------------------------------|--------------------------------------|--------------------------------------|--------------------------------------|-------------------------------|--------------------------------------|--------------------------------------|--------------------------|--------------------------------------|--------------------------|--------------------------------------|--------------------------------------|--------------------------|--------------------------|-----------------------------------|-----------------------------|------------------------------------------------------------|
| <b>Pathogenic variant</b>             | c.2021A>T, p.(Asn674Ile)             | c.2381G>A, p.(Arg794Gln)             | c.1975C>T, p.(Arg659Trp)             | c.1940A>G, p.(Tyr647Cys)      | c.2365G>A, p.(Asp789Asn)             | c.1652T>C, p.(Leu551Pro)             | c.1958C>G, p.(Ala653Gly) | c.1949A>T, p.(Asn650Ile)             | c.1975C>T, p.(Arg659Trp) | c.2365G>A, p.(Asp789Asn)             | c.1658C>T, p.(Ser553Leu)             | c.1949A>C, p.(Asn650Thr) | c.1658C>T, p.(Ser553Leu) | c.1972G>T, p.(Asp658Tyr)          | c.1957G>A, p.(Ala653Thr)    | c.2231G>A, p.(Cys744Tyr)                                   |
| <b>Microcephaly (at last control)</b> | - 3.6SD                              | - 5.2 SD                             | - 7.1 SD                             | - 1.5 SD                      | - 6.5 SD                             | n/a                                  | - 1.6 SD                 | - 5.7 SD                             | n/a                      | - 6.7 SD                             | - 7.1 SD                             | - 2.7 SD                 | - 5.2 SD                 | - 2 SD                            | reduced brain weight, -2 SD | n/a (reduced brain weight)                                 |
| <b>Development</b>                    | Severe delay                         | Severe delay                         | Severe delay                         | Severe delay                  | Severe delay                         | Severe delay                         | Severe delay             | Severe delay                         | Severe delay             | Severe delay                         | Severe delay                         | n/a                      | Severe delay             | Severe delay                      | n/a                         | n/a                                                        |
| <b>Neurology</b>                      | Spastic tetraplegia, axial hypotonia | Spastic tetraplegia, axial hypotonia | Spastic tetraplegia, axial hypotonia | Pseudobulbar palsy, hypotonia | Spastic tetraplegia, axial hypotonia | Spastic tetraplegia, axial hypotonia | n/a                      | Spastic tetraplegia, axial hypotonia | Mild scoliosis           | Spastic tetraplegia, axial hypotonia | Spastic tetraplegia, axial hypotonia | n/a                      | Hypertonia               | Hypo- and hypertonia              | n/a                         | n/a                                                        |
| <b>Onset of seizures</b>              | 6 W                                  | 9 M                                  | 2 M                                  | 3 M                           | 1 W                                  | 1 Y                                  | n/a                      | 1 M                                  | 5 W                      | 1 M                                  | 2 W                                  | Neonatal                 | Possibly prenatally      | 4 M                               | n/a                         | n/a                                                        |
| <b>Type of seizures</b>               | Myoclonic                            | Generalized tonic-clonic             | Spasms                               | Tonic                         | Grimacing                            | Spasms                               | n/a                      | Tonic                                | Tonic                    | Gaze deviation                       | Tonic                                | Focal                    | n/a                      | Absences, drops, tonic extensions | n/a                         | n/a                                                        |
| <b>Cortical visual impairment</b>     | Yes                                  | Yes                                  | Yes                                  | Yes                           | Yes                                  | Yes                                  | n/a                      | Yes                                  | n/a                      | Yes                                  | Yes                                  | n/a                      | Poor vision              | Yes                               | n/a                         | n/a                                                        |
| <b>Movement disorders</b>             | n/a                                  | n/a                                  | n/a                                  | Yes                           | n/a                                  | Yes                                  | n/a                      | Gaze deviations                      | n/a                      | Gaze deviations                      | n/a                                  | Yes                      | No                       | No                                | n/a                         | n/a                                                        |
| <b>Contractures</b>                   | n/a                                  | n/a                                  | n/a                                  | n/a                           | n/a                                  | n/a                                  | n/a                      | n/a                                  | n/a                      | n/a                                  | n/a                                  | Yes                      | No                       | Scoliosis                         | n/a                         | No                                                         |
| <b>Cortex</b>                         | Dysgyria                             | Dysgyria                             | Dysgyria                             | Dysgyria                      | Dysgyria                             | Dysgyria                             | Dysgyria                 | Dysgyria                             | Dysgyria                 | Dysgyria                             | Dysgyria                             | Dysgyria                 | Dysgyria                 | Dysgyria                          | Dysgyria                    | Dysgyria                                                   |
| <b>Bilateral</b>                      | Yes                                  | Yes                                  | Yes                                  | Yes                           | Yes                                  | Yes                                  | Yes                      | Yes                                  | Yes                      | Yes                                  | Yes                                  | Yes                      | Yes                      | Yes                               | Yes                         | Yes                                                        |
| <b>Diffuse</b>                        |                                      |                                      | Yes                                  |                               |                                      |                                      | n/a                      |                                      |                          | Yes                                  | Yes                                  |                          |                          |                                   | n/a                         | n/a                                                        |
| <b>A&gt;P gradient</b>                | Yes                                  | Yes                                  |                                      | Yes                           | Yes                                  | Yes                                  | n/a                      | Yes                                  | Yes                      |                                      |                                      | Yes                      | Yes                      | Yes                               | n/a                         | n/a                                                        |
| <b>Perisylvian</b>                    | Affected                             | Affected                             | Affected                             | Affected                      | Affected                             | Affected                             | Affected                 | Affected                             | Affected                 | Affected                             | Affected                             | Affected                 | Affected                 | Affected                          | Affected                    | Affected                                                   |
| <b>Asymmetrical</b>                   | No                                   | No                                   | No                                   | No                            | No                                   | No                                   | L>R                      | No                                   | No                       | No                                   | No                                   | No                       | No                       | No                                | No                          | No                                                         |
| <b>White matter</b>                   | Normal                               | Reduced                              | n/a                                  | Reduced                       | Reduced                              | n/a                                  | n/a                      | Reduced                              | Reduced                  | Reduced                              | Reduced                              | Normal                   | Reduced                  | Reduced                           | n/a                         | n/a                                                        |
| <b>Ventricles</b>                     | Normal                               | Mildly enlarged                      | n/a                                  | Mildly enlarged               | Mildly enlarged                      | Normal                               | Enlarged                 | Enlarged                             | Moderately enlarged      | Enlarged                             | Enlarged                             | Mildly enlarged          | Enlarged                 | Enlarged                          | Enlarged                    | Enlarged                                                   |
| <b>Periventricular region</b>         | Normal                               | Reduced white matter                 | n/a                                  | n/a                           | n/a                                  | n/a                                  | n/a                      | Reduced white matter                 | n/a                      | n/a                                  | n/a                                  | Normal                   | Reduced white matter     |                                   |                             |                                                            |
| <b>Corpus callosum</b>                | Normal                               | Normal                               | Thin                                 | Normal                        | Normal                               | Normal                               | Hypoplastic              | Thin                                 | Normal                   | Normal                               | Thin                                 | n/a                      | Hypoplastic              | Normal                            | ACC                         | Hypoplastic                                                |
| <b>Basal ganglia</b>                  | Normal                               | Normal                               | Normal                               | Normal                        | Normal                               | Normal                               | n/a                      | Mildly dysmorphic                    | Mildly dysmorphic        | Mildly dysmorphic                    | Mildly dysmorphic                    | Mildly dysmorphic        | Normal                   | Dysmorphic                        | Normal                      | Dysplastic                                                 |
| <b>Brain stem</b>                     | Normal                               | Normal                               | Normal                               | n/a                           | n/a                                  | n/a                                  | Normal                   | Normal                               | Normal                   | Normal                               | Normal                               | n/a                      | Abnormal myelination     | Normal                            | Normal                      | Normal                                                     |
| <b>Cerebellum</b>                     | Normal                               | Normal                               | Normal                               | n/a                           | n/a                                  | n/a                                  | Mildly enlarged          | Normal                               | Normal                   | Normal                               | Normal                               | Normal                   | Normal                   | Normal                            | Enlarged                    | Hypoplastic                                                |
| <b>Hippocampus</b>                    | Normal                               | Normal                               | n/a                                  | Normal                        | Abnormal                             | Normal                               | Normal                   | Abnormal                             | Normal                   | Normal                               | Thin leaves                          | Normal                   | Dysmorphic               | Normal                            | Normal                      | Dysmorphic                                                 |
| <b>Other features</b>                 |                                      |                                      |                                      |                               |                                      |                                      |                          |                                      |                          |                                      |                                      |                          |                          |                                   |                             | Operculum of sylvian fissure, enlarged subarachnoid spaces |

**b. Supplementary table 2 – Clinical and imaging features of patients with variants in *GRIN2B***

|                                       | Platzer et al. 2017                 | Platzer et al. 2017               | Platzer et al. 2017                          | Platzer et al. 2017                                    | Platzer et al. 2017         | Platzer et al. 2017                          | P5 (This paper)                       | P6 (This paper)                                              | P7 (This paper)                    |
|---------------------------------------|-------------------------------------|-----------------------------------|----------------------------------------------|--------------------------------------------------------|-----------------------------|----------------------------------------------|---------------------------------------|--------------------------------------------------------------|------------------------------------|
| <b>Pathogenic variant</b>             | c.1907C>T,<br>p.(Ala636Val)         | c.1916C>T,<br>p.(Ala639Val)       | c.1963A>T,<br>p.(Ile655Phe)                  | c.2079A>T,<br>p.(Arg693Ser)                            | c.2430C>A,<br>p.(Ser810Arg) | c.2429G>A,<br>p.(Ser810Asn)                  | c.2437C>G,<br>p.(Leu813Val)           | c.2438T>C,<br>p.(Leu813Pro)                                  | c. 2453T>C,<br>p.(Met818Thr)       |
| <b>Microcephaly</b>                   | Yes                                 | n/a                               | Yes                                          | n/a                                                    | Yes                         | n/a                                          | - 3.2 SD                              | - 2.2 SD                                                     | - 3.9 SD                           |
| <b>Development</b>                    | Severe delay                        | Severe delay                      | Severe delay                                 | Severe delay                                           | Severe delay                | Severe delay                                 | Severe delay                          | Severe delay                                                 | Severe delay                       |
| <b>Neurology</b>                      |                                     |                                   |                                              |                                                        |                             |                                              | Truncal hypotonia,<br>limb hypertonia | Truncal hypotonia,<br>limb hypertonia,<br>pseudobulbar palsy | Hypertonia                         |
| <b>Onset of seizures</b>              |                                     |                                   |                                              |                                                        |                             |                                              | 4 M                                   | 2 Y 3 M                                                      | 10 W                               |
| <b>Type of seizures</b>               | Focal seizures,<br>epileptic spasms | Focal and<br>generalized seizures | Generalized<br>seizures, epileptic<br>spasms | Generalized and<br>focal seizures,<br>epileptic spasms | Focal seizures              | Generalized<br>seizures, epileptic<br>spasms | Epileptic spasms                      | GTC with fever                                               | Rapid and rolling<br>eye movements |
| <b>Cortical visual<br/>impairment</b> | Yes                                 | Yes                               | Yes                                          |                                                        |                             |                                              | No but strabism                       | Yes                                                          | n/a                                |
| <b>Movement<br/>disorders</b>         |                                     |                                   |                                              |                                                        |                             |                                              | No                                    |                                                              |                                    |
| <b>Contractures</b>                   |                                     |                                   |                                              |                                                        |                             |                                              | No                                    |                                                              |                                    |
| <b>Cortex</b>                         | Dysgyria                            | Dysgyria                          | Dysgyria                                     | Dysgyria                                               | Dysgyria                    | Dysgyria                                     | Dysgyria                              | Dysgyria                                                     | Dysgyria                           |
| <b>Bilateral</b>                      | Yes                                 | Yes                               | Yes                                          | Yes                                                    | Yes                         | Yes                                          | Yes                                   | Yes                                                          | Yes                                |
| <b>Diffuse</b>                        | Yes                                 | Yes                               | Yes                                          | Yes                                                    | Yes                         | Yes                                          | Yes                                   |                                                              |                                    |
| <b>A&gt;P gradient</b>                |                                     |                                   |                                              |                                                        |                             |                                              |                                       | Yes                                                          | Yes                                |
| <b>Perisylvian</b>                    | Affected                            | Affected                          | Affected                                     | Affected                                               | Affected                    | Affected                                     | Affected                              | Affected                                                     | Affected                           |
| <b>Asymmetrical</b>                   | No                                  | No                                | No                                           | No                                                     | No                          | No                                           | No                                    | No                                                           | Yes, left > right                  |
| <b>White matter</b>                   | Affected                            | Affected                          | Affected                                     | Affected                                               | Affected                    | Affected                                     | Occipitally reduced                   | Reduced                                                      | Reduced                            |
| <b>Ventricles</b>                     | n/a                                 | Severely enlarged                 | Mildly enlarged                              | Enlarged                                               | Severely enlarged           | Severely enlarged                            | Colpocephaly                          | Enlarged                                                     | Enlarged (left)                    |
| <b>Periventricular<br/>region</b>     | n/a                                 | Normal                            | Normal                                       | Normal                                                 | Normal                      | Normal                                       | Normal                                | Normal                                                       | Normal                             |
| <b>Corpus callosum</b>                | Normal                              | Hypoplastic                       | Normal                                       | Normal                                                 | Hypoplastic                 | Hypoplastic                                  | Hypoplastic                           | Normal                                                       | Dysmorphic                         |
| <b>Basal ganglia</b>                  | Dysmorphic                          | Dysmorphic                        | Dysmorphic                                   | Dysmorphic                                             | Dysmorphic                  | Dysmorphic                                   | Enlarged                              | Normal                                                       | Dysmorphic                         |
| <b>Brain stem</b>                     | Normal                              | Normal                            | Normal                                       | Normal                                                 | Normal                      | Normal                                       | Normal                                | Normal                                                       | Normal                             |
| <b>Cerebellum</b>                     | Normal                              | Normal                            | Normal                                       | Normal                                                 | Normal                      | Normal                                       | Normal                                | Normal                                                       | Normal                             |
| <b>Hippocampus</b>                    | Dysplastic                          | Dysplastic                        | Dysplastic                                   | Normal                                                 | Dysplastic                  | Normal                                       | Normal                                | Dysmorphic                                                   | Normal                             |

**c. Supplementary table 3.** Abnormal brain MRI findings in NMDAR MCD patients.

| MRI                        | This series |        | Cases reported in the literature |        |
|----------------------------|-------------|--------|----------------------------------|--------|
|                            | GRIN1       | GRIN2B | GRIN1                            | GRIN2B |
| <b>Dysgyria</b>            | 4/4         | 3/3    | 12/12                            | 6/6    |
| <b>Bilateral</b>           | 4/4         | 3/3    | 12/12                            | 6/6    |
| <b>Diffuse</b>             | 0/2         | 2/3    | 3/11                             | 6/6    |
| <b>A&gt;P Gradient</b>     | 2/2         | 2/3    | 8/11                             | 0/6    |
| <b>Perisylvian fissure</b> | 3/3         | 3/3    | 12/12                            | 6/6    |
| <b>Asymmetry</b>           | 0/4         | 1/3    | 1/12                             | 0/6    |
| <b>White matter</b>        | 2/2         | 3/3    | 7/9                              | 6/6    |
| <b>Lateral ventricles</b>  | 4/4         | 3/3    | 9/11                             | 5/5    |
| <b>Corpus callosum</b>     | 3/4         | 1/3    | 4/11                             | 3/6    |
| <b>Basal ganglia</b>       | 2/4         | 2/3    | 4/10                             | 6/6    |
| <b>Brainstem</b>           | 1/4         | 0/3    | 0/8                              | 0/6    |
| <b>Cerebellum</b>          | 2/4         | 0/3    | 1/9                              | 0/6    |
| <b>Hippocampus</b>         | 2/4         | 1/3    | 3/11                             | 4/6    |

Abbreviations: A>P, anterior-to-posterior gradient with anterior regions more affected by dysgyria

## 2. Molecular data

### a. Supplementary table 4. ACMG-AMP criteria used to classify the NMDAR variants.

| Gene          | Mutation      | ACMG-AMP Criteria                                    | Classification    |
|---------------|---------------|------------------------------------------------------|-------------------|
| <i>GRIN1</i>  | p.(Tyr474*)   | PM2, PVS1,<br>PM3_supporting                         | Pathogenic        |
| <i>GRIN1</i>  | p.(Ser553Leu) | PM2, PP2, PP3,<br>PS2_strong, PM1                    | Pathogenic        |
| <i>GRIN1</i>  | p.(Ala653Thr) | PM2, PP2, PP3,<br>PS2_moderate, PM1                  | Likely pathogenic |
| <i>GRIN1</i>  | p.(Asp658Tyr) | PM2, PP2, PP3,<br>PS2_moderate, PM1                  | Likely pathogenic |
| <i>GRIN1</i>  | p.(Cys744Tyr) | PM2, PP2, PP3,<br>PS2_moderate, PM1,<br>PS3_moderate | Likely pathogenic |
| <i>GRIN2B</i> | p.(Leu813Val) | PM2, PP2, PP3, PM5,<br>PS2_moderate, PM1             | Likely pathogenic |
| <i>GRIN2B</i> | p.(Leu813Pro) | PM2, PP2, PP3, PM5<br>PS2_moderate, PM1              | Likely pathogenic |
| <i>GRIN2B</i> | p.(Met818Thr) | PM2, PP2, PP3,<br>PS2_strong, PM1                    | Pathogenic        |

**b. Supplementary table 5.** *In silico* predictions for the NMDAR missense variants and the homozygous *GRIN1* variants

| Gene                                       | <i>GRIN1</i>          | <i>GRIN1</i>          | <i>GRIN1</i>          | <i>GRIN1</i>         | <i>GRIN2B</i>           | <i>GRIN2B</i>         | <i>GRIN2B</i>           | <i>GRIN1</i>        |
|--------------------------------------------|-----------------------|-----------------------|-----------------------|----------------------|-------------------------|-----------------------|-------------------------|---------------------|
| <b>Mutation (NM_007327.3, NM_000834.3)</b> | c.1658C>T, p.S553L    | c.1972G>T, p.D658Y    | c.1957G>A, p.A653T    | c.2231G>A, p.C744Y   | c.2437C>G, p.L813V      | c.2438T>C, p.L813P    | c.2453T>C, p.M818T      | c.1422C>A, p.Y474*  |
| <b>Genomic position (hg19)</b>             | chr9:g.140056649C>T   | chr9:g.140057150G>T   | chr9:140057135G>A     | chr9:g.140057680G>A  | chr12:g.13720120G>C     | chr12:g.13720119A>G   | chr12:g.13720104A>G     | chr9:140055823C>A   |
| <b>SIFT</b>                                | 0.001 Damaging        | 0 Damaging            | 0.001 Damaging        | 0 Damaging           | -                       | -                     | -                       | -                   |
| <b>Polyphen2 (HDIV)</b>                    | 1 Probably damaging   | 1 Probably damaging   | 1 Probably damaging   | 1 Probably damaging  | 1 Probably damaging     | 1 Probably damaging   | 0.999 Probably damaging | -                   |
| <b>Polyphen2 (HVAR)</b>                    | 1 Probably damaging   | 1 Probably damaging   | 1 Probably damaging   | 1 Probably damaging  | 0.999 Probably damaging | 1 Probably damaging   | 0.999 Probably damaging | -                   |
| <b>LRT</b>                                 | 0 Unknown             | 0 Deleterious         | 0 Deleterious         | 0 Deleterious        | 0 Deleterious           | 0 Deleterious         | 0 Deleterious           | 0 Unknown           |
| <b>MutationTaster</b>                      | 1 Disease causing     | 1 Disease causing     | 1 Disease causing     | 1 Disease causing    | 1 Disease causing       | 1 Disease causing     | 1 Disease causing       | -                   |
| <b>MutationAssessor</b>                    | 3.415 Medium          | 2.645 Medium          | 3.21 Medium           | 3.91 High            | 3.085 Medium            | 3.23 Medium           | 2.395 Medium            | -                   |
| <b>FATHMM</b>                              | 2.01 Tolerable        | 0.55 Tolerable        | -0.32 Tolerable       | 0.51 Tolerable       | -                       | -                     | -                       | -                   |
| <b>PROVEAN</b>                             | -5.03 Damaging        | -6 Damaging           | -3.35 Damaging        | -9.82 Damaging       | -                       | -                     | -                       | -                   |
| <b>VEST3</b>                               | 0.899 Damaging        | 0.574 Damaging        | 0.749 Damaging        | 0.99 Damaging        | 0.851 Damaging          | 0.981 Damaging        | 0.935 Damaging          | -                   |
| <b>MetaSVM</b>                             | -0.447 Tolerable      | -0.328 Tolerable      | 0.018 Damaging        | 0.227 Damaging       | 0.106 Damaging          | 0.257 Damaging        | -0.36 Tolerable         | -                   |
| <b>MetaLR</b>                              | 0.202 Tolerable       | 0.34 Tolerable        | 0.486 Tolerable       | 0.473 Tolerable      | 0.503 Damaging          | 0.547 Damaging        | 0.329 Tolerable         | -                   |
| <b>M_CAP</b>                               | 0.425 Damaging        | 0.914 Damaging        | 0.823 Damaging        | 0.48 Damaging        | 0.606 Damaging          | 0.919 Damaging        | 0.551 Damaging          | -                   |
| <b>CADD</b>                                | 32 Damaging           | 26.7 Damaging         | 28.1 Damaging         | 28.4 Damaging        | 25.4 Damaging           | 28.2 Damaging         | 26 Damaging             | 36 Damaging         |
| <b>DANN</b>                                | 0.999 Damaging        | 0.995 Damaging        | 0.999 Damaging        | 0.997 Damaging       | 0.998 Damaging          | 0.999 Damaging        | 0.994 Damaging          | 0.995 Damaging      |
| <b>FATHMM_MKL</b>                          | 0.937 Damaging        | 0.96 Damaging         | 0.944 Damaging        | 0.955 Damaging       | 0.974 Damaging          | 0.985 Damaging        | 0.985 Damaging          | 0.283 Tolerable     |
| <b>Eigen</b>                               | 0.578 Damaging        | 0.604 Damaging        | 0.623 Damaging        | 0.874 Damaging       | 0.638 Damaging          | 0.868 Damaging        | 0.807 Damaging          | -0.385 Tolerable    |
| <b>GenoCanyon</b>                          | 1 Damaging            | 1 Damaging            | 1 Damaging            | 1 Damaging           | 1 Damaging              | 1 Damaging            | 1 Damaging              | 1 Damaging          |
| <b>fitCons</b>                             | 0.598 Tolerable       | 0.658 Tolerable       | 0.658 Tolerable       | 0.652 Tolerable      | 0.554 Tolerable         | 0.554 Tolerable       | 0.554 Tolerable         | 0.598 Tolerable     |
| <b>GERP</b>                                | 3.83 Conserved        | 3.63 Conserved        | 3.63 Conserved        | 4.97 Conserved       | 4.54 Conserved          | 5.43 Conserved        | 5.43 Conserved          | -3.09 Nonconserved  |
| <b>phyloP</b>                              | 5.468 Conserved       | 9.153 Conserved       | 9.582 Conserved       | 9.314 Conserved      | 5.025 Conserved         | 9.32 Conserved        | 9.32 Conserved          | -1.601 Nonconserved |
| <b>phastCons</b>                           | 1 Conserved           | 1 Conserved           | 1 Conserved           | 1 Conserved          | 1 Conserved             | 1 Conserved           | 1 Conserved             | 0.0001 Nonconserved |
| <b>SiPhy</b>                               | 14.305 Conserved      | 12.526 Conserved      | 12.526 Conserved      | 16.773 Conserved     | 14.17 Conserved         | 15.484 Conserved      | 15.484 Conserved        | 10.605 Nonconserved |
| <b>REVEL</b>                               | 0.655 Damaging        | 0.469 Damaging        | 0.676 Damaging        | 0.776 Damaging       | 0.61 Damaging           | 0.855 Damaging        | 0.781 Damaging          | -                   |
| <b>ReVe</b>                                | 0.888 Damaging        | 0.721 Damaging        | 0.869 Damaging        | 0.98 Damaging        | 0.893 Damaging          | 0.988 Damaging        | 0.96 Damaging           | 0.416 Tolerable     |
| <b>ClinPred</b>                            | 0.97518684 pathogenic | 0.99884295 pathogenic | 0.99699389 pathogenic | 0.9999705 pathogenic | 0.98702520 pathogenic   | 0.99549469 pathogenic | 0.99139735 pathogenic   | -                   |

Derived from Varcards <http://159.226.67.237/sun/varcards/>

### 3. Functional evaluation of a human glutamate receptor variant p.Cys744Tyr in *GRIN1* *in vitro*

#### a. Methods

cDNA Plasmid Constructs: The p.Cys744Tyr and the p.Ala653Thr *GRIN1* variants were introduced into a GluN1 cDNA (RefSeq NM.007327.3) plasmid construct, and the p.Ala653Thr *GRIN2B* variant into the GluN2B cDNA (RefSeq NM\_000834.3) via a Quikchange (Agilent) mutagenesis protocol. All experiments used cDNAs encoding human gene sequences verified with Sanger sequencing (Eurofins). mRNA was synthesized from cDNA using mMESSAGE mMACHINE (Invitrogen).

mRNA Injections: The cRNAs for GluN1-C744Y, GluN1-A653T or GluN1-WT were combined, separately, with human GluN2A-WT cRNA, or GluN1-WT and GluN2B-M818T were combined separately, and injected into stage V and VI oocytes and incubated at 16 C for 2–7 days in Barth's culture medium containing (in mM): 88 NaCl, 2.4 NaHCO<sub>3</sub>, 1 KCl, 0.33 Ca(NO<sub>3</sub>)<sub>2</sub>, 0.41 CaCl<sub>2</sub>, 0.82 MgSO<sub>4</sub>, and 10 HEPES (pH 7.4). For experiments, oocytes were removed from the incubator and perfused in recording Barth's solution for two-electrode voltage clamp (TEVC) electrophysiological recordings. Conditions for each experiment are below.

L-Glutamate dose response studies: The recording solution for these studies contained (in mM): NaCl (90), KCl (1.0), BaCl<sub>2</sub> (0.5), HEPES (10), and EDTA (0.01), adjusted to pH 7.4 (at 23 degrees C) with NaOH. The oocyte membrane potential was clamped at -40 mV. After a steady baseline was obtained, oocytes were perfused with increasing concentrations of L-glutamate (seven concentrations selected from 0.003, 0.01, 0.03, 0.1, 0.3, 1, 3, 10, 30, and 100 μM) for 0.75 min duration each in the continuous presence of 100 μM glycine. Results at each L-glutamate concentration were normalized to the maximum receptor activation levels (defined as 100%) and the EC<sub>50</sub> values obtained by fitting concentration-response data with Equation 1 (below).

Glycine dose response studies: The recording solution for these studies was similar as for the L-glutamate studies. The oocyte membrane potential was clamped at -40 mV. After a steady baseline was obtained, oocytes were perfused with increasing concentrations of glycine (seven concentrations selected from 0.003, 0.01, 0.03, 0.1, 0.3, 1, 3, 10, 30 and 100 μM) for 0.75 min duration each in the continuous presence of 100 μM L-glutamate. Results at each glycine concentration were normalized to the maximum receptor activation levels (defined as 100%) and the EC<sub>50</sub> values obtained by fitting concentration-response data with Equation 1 (below).

Mg<sup>2+</sup> dose inhibition studies: The recording solution for Mg<sup>2+</sup> studies contained (in mM): NaCl (90), KCl (1.0), BaCl<sub>2</sub> (0.5), and HEPES (10) adjusted to pH 7.4 (at 23 degrees C) with NaOH. The oocyte membrane potential was clamped at -60 mV. After a steady baseline was obtained, oocytes were maximally activated with 100 μM L-glutamate and 100 μM glycine and were then perfused with increasing concentrations of Mg<sup>2+</sup> (3, 10, 30, 100, 300, and 1000 μM) in the presence of maximal glutamate and glycine. The current responses to glutamate and glycine at each Mg<sup>2+</sup> concentration were normalized to the maximum receptor activation levels in the absence of Mg<sup>2+</sup> (defined as 100%) and the IC<sub>50</sub> values obtained by fitting concentration-inhibition data with Equation 2 (below).

pH studies: The recording solution for these studies contained (in mM): NaCl (90), KCl (1.0), BaCl<sub>2</sub> (0.5), HEPES (10), and EDTA (0.01), adjusted to either pH 6.8 or pH 7.6 (at 23 degrees C) with HCl or NaOH. The oocyte membrane potential was clamped at -40 mV. After a steady baseline was obtained in pH 7.6 recording buffer the oocytes were maximally activated with 100 μM L-glutamate and 100 μM glycine in pH 7.6 buffer. Following a washout period to reestablish baseline, the oocytes were then maximally activated with 100 μM L-glutamate and 100 μM glycine in pH 6.8 buffer. The percent current at pH 6.8 was then determined compared to the current at pH 7.6 (defined as 100%).

Zn<sup>2+</sup> dose inhibition studies: Oocytes expressing recombinant human glutamate receptors were perfused with recording solution containing (in mM): NaCl (90), KCl (1.0), BaCl<sub>2</sub> (0.5), Tricine (10), and HEPES (10) adjusted to pH 7.3 (at 23 degrees C) with NaOH. The oocyte membrane potential was clamped at -20 mV. After a steady baseline is obtained, oocytes were maximally activated with 50 μM L-glutamate and 50 μM glycine, and then in the continuous presence of maximal glutamate and glycine, were perfused with increasing concentrations of Zn<sup>2+</sup> (1, 3, 10, 30, 100, and 300 nM). . Results at each Zn<sup>2+</sup> concentration are normalized to the maximum receptor activation levels without Zn<sup>2+</sup> (defined as 100%) and IC<sub>50</sub> values obtained by fitting concentration-inhibition data with Equation 2 (below).

β-Lactamase Assay: HEK cells were plated in 96-well plates and transiently transfected with cDNA encoding GluN2A-WT and β-lac-GluN1-WT or β-lac-GluN1-C744Y or β-lac-GluN1-A653T. Eight wells were transfected with surface and total expression activities measured in 4 wells each 24 hr post transfection. The ratio of surface (unlysed cells) to total (lysed cells) β-lactamase expression was measured for the β-lac- GluN1-C744Y and β-lac- GluN1-A653T compared to β-lac-GluN1-WT. See PMID 27839871 for further information.

Equation 1: Response = 100 / ( ( 1 + EC<sub>50</sub> / [agonist] )<sup>nH</sup> ) where EC<sub>50</sub> is the agonist concentration that elicited the half maximal response, and nH is the Hill slope.

Equation 2: Response = (100 - minimum) / (1 + ([concentration] / IC<sub>50</sub>)<sup>nH</sup>) + minimum where minimum is the residual percent response in saturating concentration (constrained to ≥ 0) of the experimental compounds, IC<sub>50</sub> is the concentration of inhibitor that causes half maximal inhibition, and nH is the Hill slope.

Statistical comparisons: For analysis of the IC<sub>50</sub> or EC<sub>50</sub> results, the log values of the IC<sub>50</sub>'s or EC<sub>50</sub>'s were used for comparison. If the 95% confidence intervals of WT and variant results for each assay do not overlap, a fold effect was then calculated with positive and negative fold values indicating increased or decreased effect on receptor activity, respectively, for that assay measurement.



## b. Results

| Measurement                              | GluN1-WT/<br>GluN2A-WT<br>Mean | 95% CI      | n  | GluN1-C744Y/<br>GluN2A-WT<br>Mean | 95% CI       | n  | Fold Effect on<br>NMDAR <sup>C</sup> |
|------------------------------------------|--------------------------------|-------------|----|-----------------------------------|--------------|----|--------------------------------------|
| Glutamate EC <sub>50</sub> , μM          | 4.0                            | (3.6, 4.5)  | 12 | 1.1                               | (0.9, 1.3)   | 12 | <b>3.8</b>                           |
| Glycine, EC <sub>50</sub> , μM           | 1.3                            | (1.1, 1.5)  | 10 | 0.7                               | (0.61, 0.86) | 12 | <b>1.8</b>                           |
| Mg <sup>2+</sup> , IC <sub>50</sub> , μM | 17                             | (13, 21)    | 10 | 29                                | (21, 38)     | 12 | <b>NE</b>                            |
| Proton, % <sup>A</sup>                   | 44                             | (40, 49)    | 12 | 74                                | (68, 81)     | 12 | <b>1.7</b>                           |
| Zinc, IC <sub>50</sub> , nM              | 12                             | (6.8, 21.9) | 10 | 16                                | (9.7, 27)    | 12 | <b>NE</b>                            |
| Zinc, % residual<br>(Ymin) <sup>B</sup>  | 28                             | (18, 37)    | 10 | 52                                | (42, 63)     | 12 | <b>1.9</b>                           |
| Surface/Total<br>Expression %WT          | 100                            | (78,122)    | 4  | 68                                | (58,77)      | 4  | <b>-1.4</b>                          |
| Total Expression<br>%WT                  | 100                            | (84,116)    | 4  | 150                               | (133,166)    | 4  | <b>1.5</b>                           |

| Measurement                              | GluN1-WT/<br>GluN2A-WT<br>Mean | 95% CI     | n  | GluN1-A653T/<br>GluN2A-WT<br>Mean | 95% CI         | n  | Fold Effect on<br>NMDAR <sup>C</sup> |
|------------------------------------------|--------------------------------|------------|----|-----------------------------------|----------------|----|--------------------------------------|
| Glutamate EC <sub>50</sub> , μM          | 3.2                            | (2.9, 3.5) | 15 | 0.12                              | (0.10, 0.15)   | 14 | <b>26.4</b>                          |
| Glycine, EC <sub>50</sub> , μM           | 1.1                            | (0.9, 1.2) | 15 | 0.024                             | (0.019, 0.032) | 11 | <b>44.6</b>                          |
| Mg <sup>2+</sup> , IC <sub>50</sub> , μM | 24                             | (18, 32)   | 12 | 23                                | (17, 31)       | 12 | <b>NE</b>                            |
| Proton, % <sup>A</sup>                   | 46                             | (41, 50)   | 12 | 88                                | (85, 91)       | 11 | <b>1.9</b>                           |
| Zinc, IC <sub>50</sub> , nM              | 6.5                            | (5.5, 7.7) | 12 | 46                                | (32, 66)       | 12 | <b>7.1</b>                           |
| Zinc, % residual<br>(Ymin) <sup>B</sup>  | 28                             | (24, 32)   | 12 | 67                                | (57, 75)       | 12 | <b>2.4</b>                           |
| Surface/Total<br>Expression %WT          | 100                            | (92,108)   | 4  | 111                               | (95,127)       | 4  | <b>NE</b>                            |
| Total Expression<br>%WT                  | 100                            | (95,105)   | 4  | 126                               | (111,141)      | 4  | <b>1.2</b>                           |

| Measurement                              | GluN1-WT/<br>GluN2B-WT<br>Mean | 95% CI       | n  | GluN1-WT/<br>GluN2B-M818T<br>Mean <sup>D</sup> | 95% CI         | n  | Fold Effect on<br>NMDAR <sup>C</sup> |
|------------------------------------------|--------------------------------|--------------|----|------------------------------------------------|----------------|----|--------------------------------------|
| Glutamate EC <sub>50</sub> , μM          | 1.0                            | (0.9, 1.2)   | 19 | 0.42                                           | (0.30, 0.58)   | 19 | <b>2.5</b>                           |
| Glycine, EC <sub>50</sub> , μM           | 0.29                           | (0.26, 0.33) | 20 | 0.13                                           | (0.097, 0.199) | 17 | <b>2.2</b>                           |
| Mg <sup>2+</sup> , IC <sub>50</sub> , μM | 29                             | (19, 42)     | 26 | 22                                             | (14, 37)       | 28 | <b>NE</b>                            |
| Proton, % <sup>A</sup>                   | 14                             | (11, 16)     | 12 | 37                                             | (27, 47)       | 14 | <b>2.7</b>                           |
| Zinc, IC <sub>50</sub> , nM              | not done                       | -            | -  | not done                                       | -              | -  | -                                    |
| Zinc, % residual<br>(Ymin) <sup>B</sup>  | not done                       | -            | -  | not done                                       | -              | -  | -                                    |
| Surface/Total<br>Expression %WT          | not done                       | -            | -  | not done                                       | -              | -  | -                                    |
| Total Expression<br>%WT                  | not done                       | -            | -  | not done                                       | -              | -  | -                                    |

A: % current remaining measured at pH 6.8 compared to pH 7.6 at maximal L-glutamate and glycine activation

B: Current remaining after maximum inhibition by zinc, i.e., the residual current remaining.

C: Fold effect only calculated if 95% CI's do not overlap. Positive and negative fold effects represent gain of function or loss of function effects, respectively, for the parameter measured. NE = no effect.

n= the number of oocytes evaluated for the measured endpoint; CI = confidence interval.

D: Results for GluN2B-M818T reported here are new data and are in line with results reported previously (Platzer et al., J Med Genet 2017;54:460–70).

#### **4. Neuropathological and immunohistochemical studies**

##### **a. Morphological studies**

A complete autopsy was performed in the two fetuses (individuals 3 and 4) and one neonate (individual 8) following standardized protocols. Fetal biometric data were evaluated according to Guilhard-Costa et al. (2002). The brains were fixed in a 10% formalin-zinc buffer solution for at least one month. Brain growth and macroscopic assessment of brain maturation including gyration were evaluated according to the criteria of Guilhard-Costa and Larroche and the atlas of Feess-Higgins and Larroche (1990, 1987). Eight-micrometer sections obtained from paraffin-embedded tissues were stained using Haematoxylin-Eosin. Immunohistochemical procedures included a microwave pre-treatment protocol to aid antigen retrieval (pre-treatment CC1 kit, Ventana Medical Systems Inc, Tucson AZ). Incubations with the primary antibodies listed in supplementary Table 1 were performed for 32 or 44 minutes at room temperature using the Ventana Benchmark XT system. After incubation, slides were processed by means of the Ultraview Universal DAB detection kit (Ventana). A comparative semi-quantitative analysis of immunolabellings in the germinative and intermediate zones as well as in the different layers of the frontal cortex of affected and control patients was assessed and evaluated as follows: 0: no cell labelled; +: very few cells labelled; ++: moderate density of immunolabelled cells and +++: high density of immunolabelled cells.

b.

| <b>Supplementary table 6: Antibodies used for the study</b>           |                                       |                    |          |                                                                          |
|-----------------------------------------------------------------------|---------------------------------------|--------------------|----------|--------------------------------------------------------------------------|
| <b>Neural stem cells and progenitors</b>                              |                                       |                    |          |                                                                          |
| Antisera                                                              | Cells                                 | Company            | Dilution | target                                                                   |
| Ki67                                                                  | Proliferating cells                   | Agilent            | 1 :100   | Cell cycle related protein                                               |
| PAX6                                                                  | Neuroepithelium<br>vRGC, oRGC         | Protein Tech group | 1 :50    | Stem cell transcription factor                                           |
| SOX2                                                                  | vRGC, oRGC                            | Abcam              | 1 :150   | Stem cell self-renewal<br>transcription factor                           |
| <b>Ganglionic eminence and cortical interneurons</b>                  |                                       |                    |          |                                                                          |
| GABA                                                                  | Interneurons                          | Invitrogen         | 1:100    | Neurotransmitter                                                         |
| Calretinin                                                            | Cortical interneurons                 | Life technology    | 1:100    | Calcium binding protein<br>Cortical interneurons                         |
| <b>Post-mitotic neurons and layer markers</b>                         |                                       |                    |          |                                                                          |
| MAP2                                                                  | Migrating neurons<br>Layers III and V | Sigma Aldrich      | 1:100    | Brain microtubule-associated<br>protein                                  |
| SATB2                                                                 | Layers II-IV                          | Abcam              | 1:20     | Special AT-rich sequence-<br>binding protein                             |
| CTIP2                                                                 | Layers V-VI                           | Abcam              | 1:100    | COUP-TF-interacting protein<br>2C2H2 zinc finger<br>transcription factor |
| vRGC: ventricular radial glial cells; oRGC: outer radial glial cells; |                                       |                    |          |                                                                          |

c.

**Supplementary table 7:** comparative semi-quantitative analysis of immunolabelling in the germinative and intermediate zones as well as in the different layers of the frontal cortex of affected and control patients

| Antibodies | Fœtus 1<br>25 WG                                                                                     | Control<br>25 WG                             | Fœtus 2<br>30 WG                                                   | Control<br>30 WG                            | Patient 3<br>38 WG, dead at<br>postnatal day 6   | Control<br>39 WG                 |
|------------|------------------------------------------------------------------------------------------------------|----------------------------------------------|--------------------------------------------------------------------|---------------------------------------------|--------------------------------------------------|----------------------------------|
| PAX6       | ++ LGE                                                                                               | +++ LGE                                      | 0                                                                  | 0                                           | 0                                                | 0                                |
| SOX2       | ++ LGE                                                                                               | +++ LGE                                      | ++ LGE<br>+ SVZ                                                    | +++ SVZ<br>+++ LGE                          | NA                                               | ++ VZ                            |
| Ki67       | + LGE                                                                                                | ++ LGE                                       | +++ LGE<br>+ SVZ                                                   | ++ LGE<br>+++ OSVZ                          | 0                                                | 0                                |
| GABA       | 0 LGE<br>+ IZ<br>+ under the CP                                                                      | +++ LGE<br>+++ VZ, SVZ,<br>++ CP             | + LGE and SVZ<br>+ Superficial<br>micropolygyric CP                | ++ diffuse CP                               | + in layer II and III                            | ++ all layers                    |
| Calretinin | 0 LGE and VZ<br>+ Layer I<br>(Cajal Retzius cells)<br>0 in micropolygyric CP<br>Dispersed in nodules | + IZ<br>+ VZ<br>+ LGE                        | + LGE<br>+ superficial<br>micropolygyric CP<br>+ IZ<br>+++ nodules | + VZ<br>+ LGE<br>++ Layers II, III and<br>V | Fibre network layer I<br>+ interneurons layer II | ++ layers II and III             |
| MAP2       | Periventricular nodules<br>+ Migrating neurons in IZ<br>0 CP                                         | +++ VZ<br>Layers III and V                   | + micropolygyric CP<br>Dysmorphic neurons                          | ++ layer II and III<br>+++ layer V          | + Immature neurons                               | ++ layers III and V              |
| SATB2      | Immature neurons in<br>layer II                                                                      | + VZ and LGE<br>++ IZ<br>+++ diffuse CP      | 0                                                                  | Layers II-IV<br>+++ in layer II             | 0                                                | Layers II-IV,<br>+++ in layer II |
| CTIP2      | 0                                                                                                    | +++ VZ and LGE<br>+++ prospective layer<br>V | 0                                                                  | ++ layer V                                  | 0                                                | ++ layers V and VI               |

WG: weeks of gestation; VZ: germinative zone of the dorsal telencephalon; SVZ subventricular zone; LGE: lateral ganglionic eminences; IZ: intermediate zone; CP: cortical plate

**d. Supplementary figure 1: Main brain macroscopic and histological findings of individual 8**

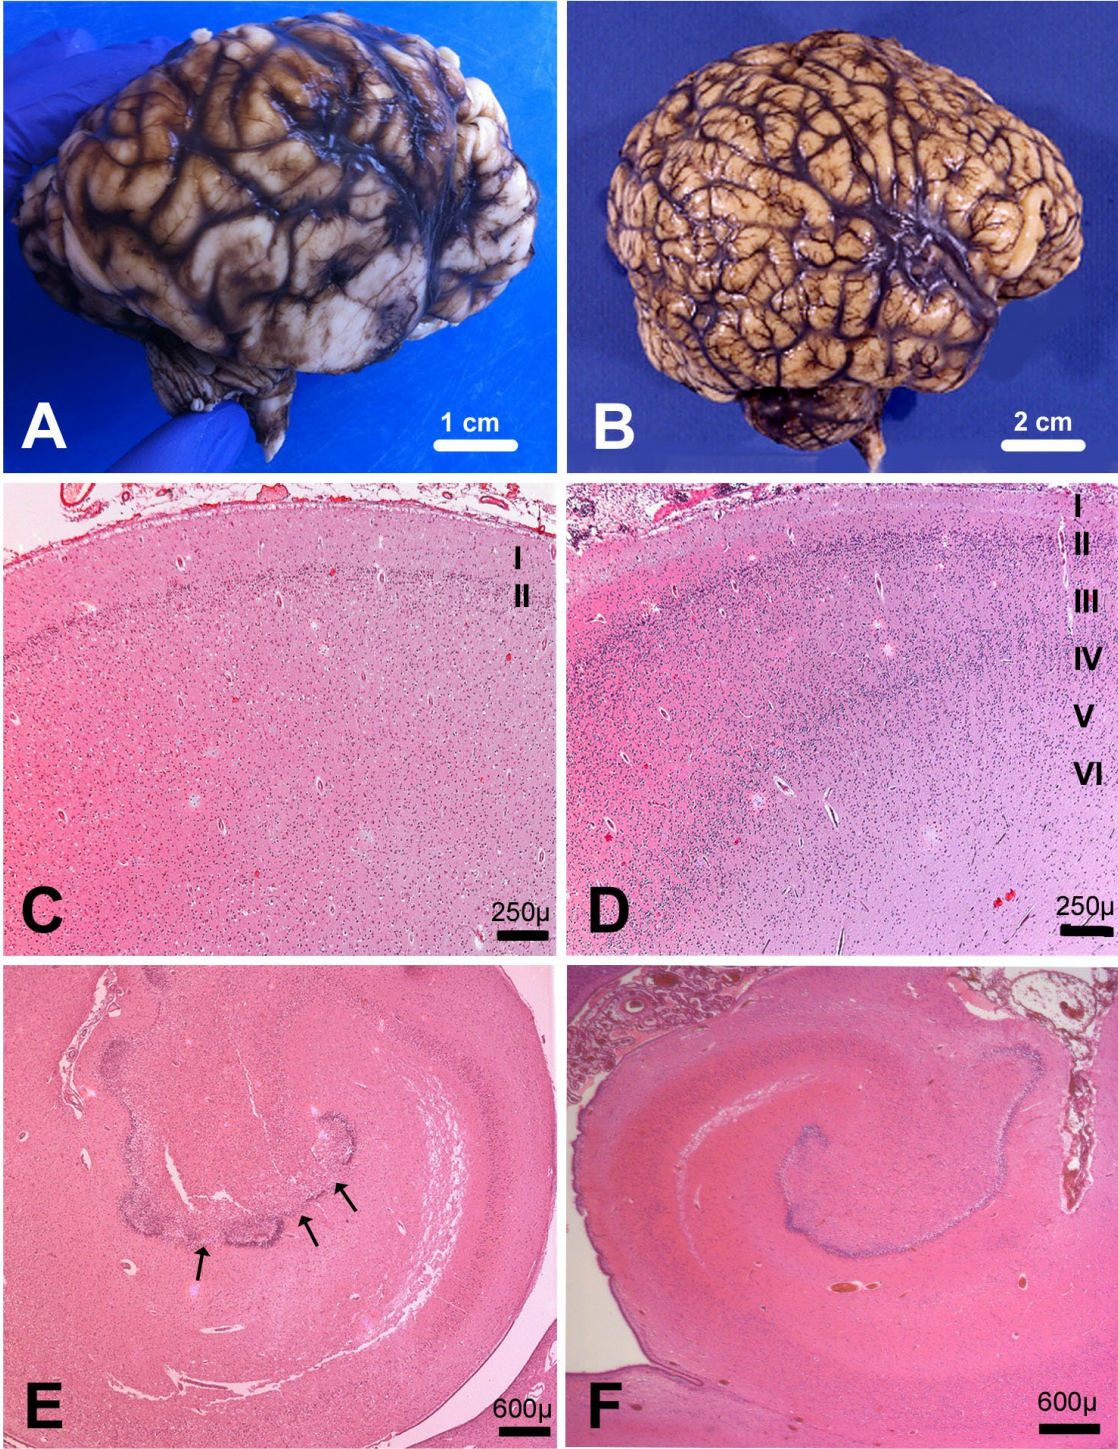

A) Macroscopic view of right side of the neonate brain displaying delayed gyration with no tertiary gyri, broadened sulci and frontal lobe hypoplasia,

B) compared to an age matched control brain, where the tertiary sulcation is in place.

C) Histological view of the temporal cortex in which neuron depletion and dyslamination are observed underneath layer II [H&E, OM x 50],

D) compared with the six-layered cortex of an age-matched control temporal cortex [same OM].

E) Histological view of the hippocampus showing an irregular and fragmented dentate nucleus (arrows), contrasting with a preserved pyramidal cell layer [H&E, OM x 50],

F) compared with a normal hippocampus at the same age [H&E, OM x 50].
